# Supplementary material
Source: Springer Nature journal article supplement (https://www.springermedizin.de/resource/supplementary/11689_2014_107_MOESM3_ESM.pdf/9673230)

**a** Amplitude of the P150 to standards  
Frontal ROIs

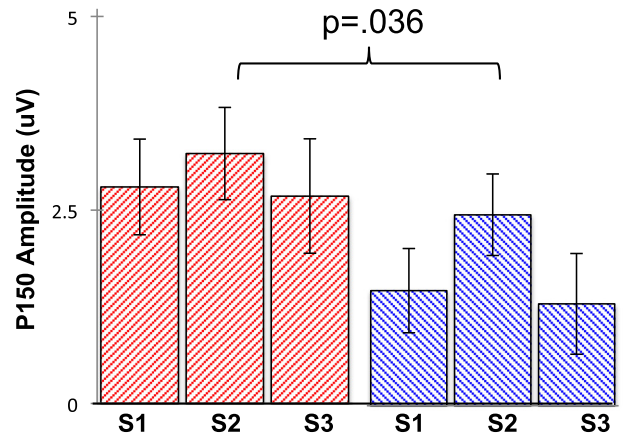

**b** Amplitude of the P150 to the deviant  
Frontal ROIs

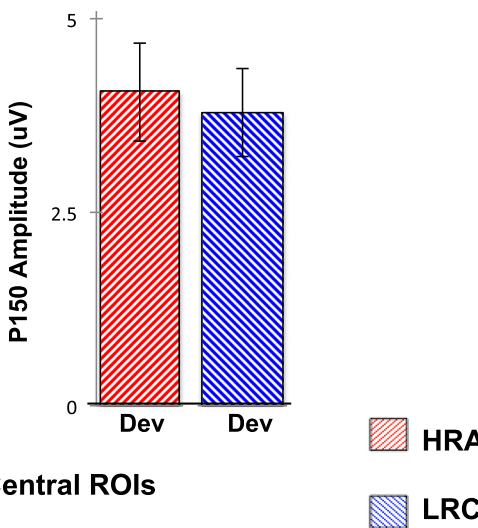

**Central ROIs**

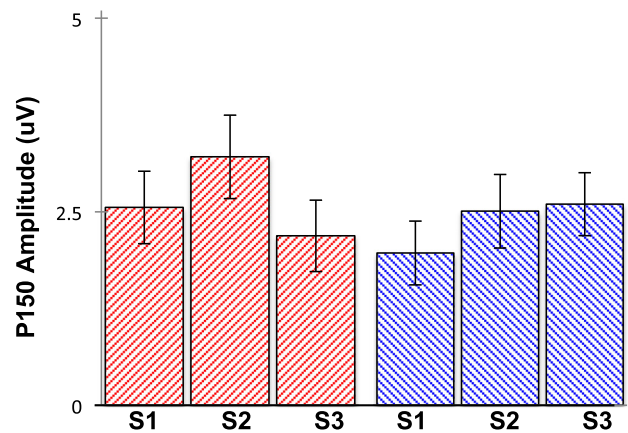

**Central ROIs**

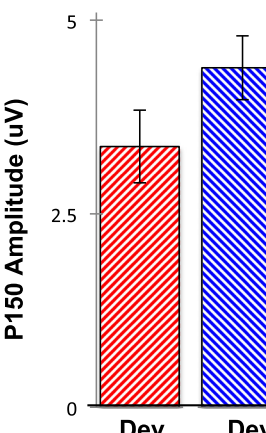

Supplement: MOESM3 [file 9673230]
